# Supplementary material for: Reply to: Underestimating digital media harm
Source: Springer Nature journal article supplement (doi:10.1038/s41562-020-0840-y), 2020-04-17
Supplement: 41562_2020_840_MOESM1_ESM.pdf [file 41562_2020_840_MOESM1_ESM.pdf]

## Reporting Summary

Nature Research wishes to improve the reproducibility of the work that we publish. This form provides structure for consistency and transparency in reporting. For further information on Nature Research policies, see [Authors & Referees](#) and the [Editorial Policy Checklist](#).

### Statistics

For all statistical analyses, confirm that the following items are present in the figure legend, table legend, main text, or Methods section.

n/a Confirmed

- The exact sample size ( $n$ ) for each experimental group/condition, given as a discrete number and unit of measurement
- A statement on whether measurements were taken from distinct samples or whether the same sample was measured repeatedly
- The statistical test(s) used AND whether they are one- or two-sided  
*Only common tests should be described solely by name; describe more complex techniques in the Methods section.*
- A description of all covariates tested
- A description of any assumptions or corrections, such as tests of normality and adjustment for multiple comparisons
- A full description of the statistical parameters including central tendency (e.g. means) or other basic estimates (e.g. regression coefficient) AND variation (e.g. standard deviation) or associated estimates of uncertainty (e.g. confidence intervals)
- For null hypothesis testing, the test statistic (e.g.  $F$ ,  $t$ ,  $r$ ) with confidence intervals, effect sizes, degrees of freedom and  $P$  value noted  
*Give  $P$  values as exact values whenever suitable.*
- For Bayesian analysis, information on the choice of priors and Markov chain Monte Carlo settings
- For hierarchical and complex designs, identification of the appropriate level for tests and full reporting of outcomes
- Estimates of effect sizes (e.g. Cohen's  $d$ , Pearson's  $r$ ), indicating how they were calculated

*Our web collection on [statistics for biologists](#) contains articles on many of the points above.*

### Software and code

Policy information about [availability of computer code](#)

Data collection

The data that support the findings of this reply are available from Monitoring the Future (MTF) and the UK data service (MCS) but restrictions apply to the availability of these data, which were used under license for the current study, and so are not publicly available. Data are however available from the relevant third-party repository after agreement to their terms of usage. Information about data collection and questionnaires can be found on the OSF ([https://osf.io/7xha2/?view\\_only=a24cc2ddeceb42bd85dbf3b2babc9a16](https://osf.io/7xha2/?view_only=a24cc2ddeceb42bd85dbf3b2babc9a16)). For brevity, we have not included all sample size measurements in this manuscript, but they can be found in the data files on the OSF.

Data analysis

The code used to analyse the relevant data can be found on the Open Science Framework ([https://osf.io/byqm5/?view\\_only=f15a442c7225477eb8378c1e717fbd8a](https://osf.io/byqm5/?view_only=f15a442c7225477eb8378c1e717fbd8a)).

For manuscripts utilizing custom algorithms or software that are central to the research but not yet described in published literature, software must be made available to editors/reviewers. We strongly encourage code deposition in a community repository (e.g. GitHub). See the Nature Research [guidelines for submitting code & software](#) for further information.

### Data

Policy information about [availability of data](#)

All manuscripts must include a [data availability statement](#). This statement should provide the following information, where applicable:

- Accession codes, unique identifiers, or web links for publicly available datasets
- A list of figures that have associated raw data
- A description of any restrictions on data availability

The data that support the findings of this reply are available from Monitoring the Future (MTF) and the UK data service (MCS) but restrictions apply to the availability of these data, which were used under license for the current study, and so are not publicly available. Data are however available from the relevant third-party repository after agreement to their terms of usage. Information about data collection and questionnaires can be found on the OSF ([https://osf.io/7xha2/?view\\_only=a24cc2ddeceb42bd85dbf3b2babc9a16](https://osf.io/7xha2/?view_only=a24cc2ddeceb42bd85dbf3b2babc9a16)). For brevity, we have not included all sample size measurements in this manuscript, but they can be found in the data files on the OSF.

## Field-specific reporting

Please select the one below that is the best fit for your research. If you are not sure, read the appropriate sections before making your selection.

Life sciences       Behavioural & social sciences       Ecological, evolutionary & environmental sciences

For a reference copy of the document with all sections, see [nature.com/documents/nr-reporting-summary-flat.pdf](https://www.nature.com/documents/nr-reporting-summary-flat.pdf)

## Behavioural & social sciences study design

All studies must disclose on these points even when the disclosure is negative.

|                   |                                                                                                                                                                                                                                                                                    |
|-------------------|------------------------------------------------------------------------------------------------------------------------------------------------------------------------------------------------------------------------------------------------------------------------------------|
| Study description | The secondary dataset used was a cohort studies collecting quantitative data                                                                                                                                                                                                       |
| Research sample   | The study uses the MCS, a representative study which follows a specific cohort of children born between September 2000 and January 2001.                                                                                                                                           |
| Sampling strategy | As we analyzed secondary data, we did not determine the sample size of the dataset. We, however, go to great lengths to put effect sizes into perspective to ensure that even the very small effect sizes that become significant using large-scale data are not over-interpreted. |
| Data collection   | Details of the data collection procedure for each study can be found on the relevant third party websites and on the OSF: <a href="https://osf.io/e84xu/">https://osf.io/e84xu/</a>                                                                                                |
| Timing            | Details are given in the third party documentation                                                                                                                                                                                                                                 |
| Data exclusions   | No data was excluded in these analyses                                                                                                                                                                                                                                             |
| Non-participation | NA                                                                                                                                                                                                                                                                                 |
| Randomization     | NA                                                                                                                                                                                                                                                                                 |

## Reporting for specific materials, systems and methods

We require information from authors about some types of materials, experimental systems and methods used in many studies. Here, indicate whether each material, system or method listed is relevant to your study. If you are not sure if a list item applies to your research, read the appropriate section before selecting a response.

### Materials & experimental systems

| n/a                                 | Involvement in the study                                        |
|-------------------------------------|-----------------------------------------------------------------|
| <input checked="" type="checkbox"/> | <input type="checkbox"/> Antibodies                             |
| <input checked="" type="checkbox"/> | <input type="checkbox"/> Eukaryotic cell lines                  |
| <input checked="" type="checkbox"/> | <input type="checkbox"/> Palaeontology                          |
| <input checked="" type="checkbox"/> | <input type="checkbox"/> Animals and other organisms            |
| <input type="checkbox"/>            | <input checked="" type="checkbox"/> Human research participants |
| <input checked="" type="checkbox"/> | <input type="checkbox"/> Clinical data                          |

### Methods

| n/a                                 | Involvement in the study                        |
|-------------------------------------|-------------------------------------------------|
| <input checked="" type="checkbox"/> | <input type="checkbox"/> ChIP-seq               |
| <input checked="" type="checkbox"/> | <input type="checkbox"/> Flow cytometry         |
| <input checked="" type="checkbox"/> | <input type="checkbox"/> MRI-based neuroimaging |

## Human research participants

Policy information about [studies involving human research participants](#)

|                            |                                                                                              |
|----------------------------|----------------------------------------------------------------------------------------------|
| Population characteristics | See above                                                                                    |
| Recruitment                | For details about recruitment see the UK Data Service documentation of the MCS Wave 5 survey |
| Ethics oversight           | Identify the organization(s) that approved the study protocol.                               |

Note that full information on the approval of the study protocol must also be provided in the manuscript.
